# Supplementary material
Source: MDPI journal article supplement (https://www.mdpi.com/2036-7481/13/1/8)
Supplement: s1 [file s1]

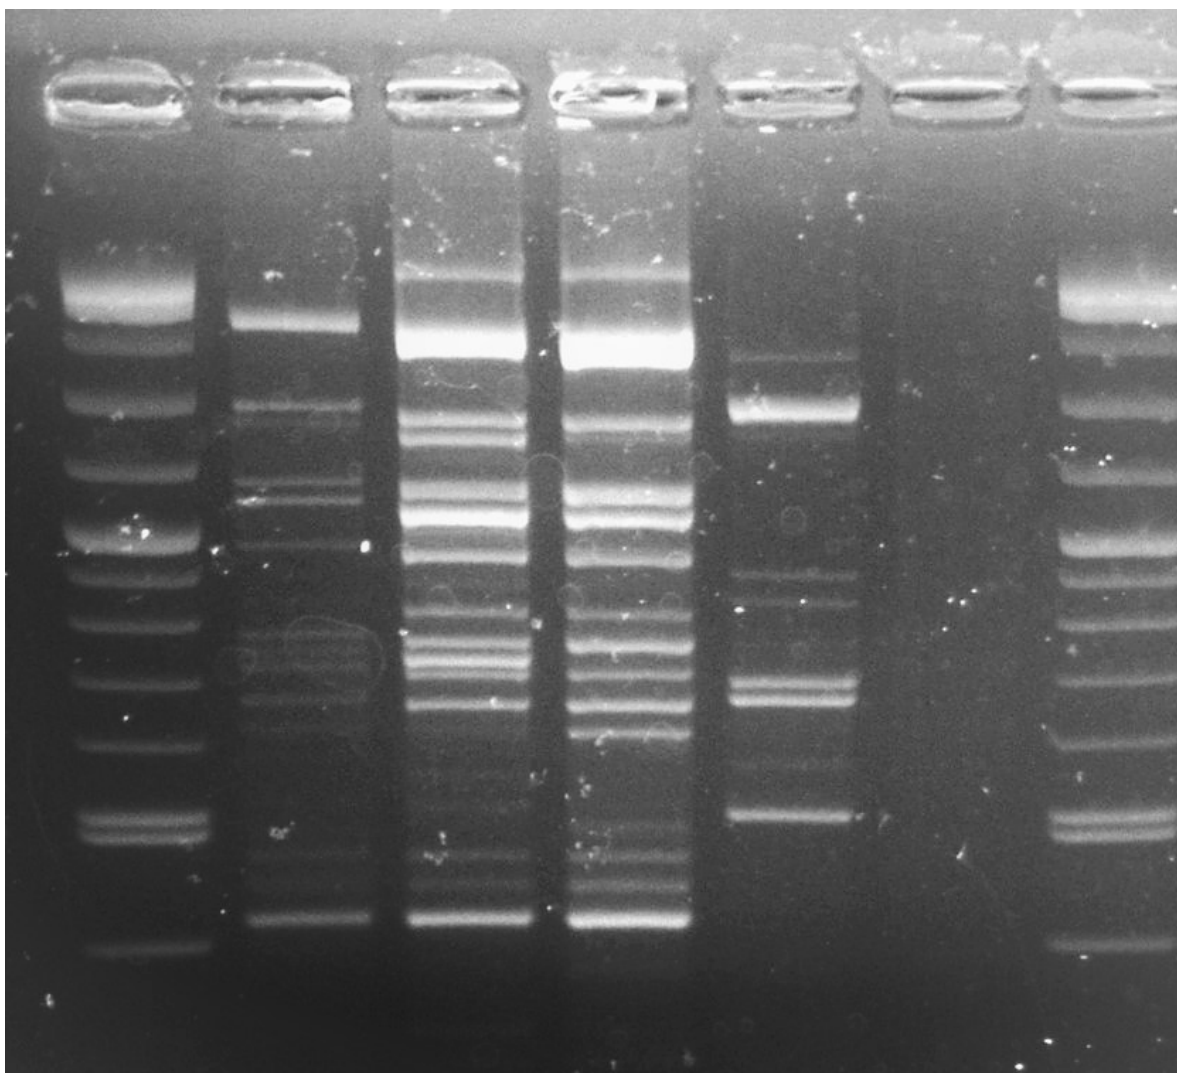

**Figure S1.** ERIC-PCR of the Pyrenean chamois isolates. Columns 1 and 7, loading buffer. 2 strain RP15178-A2, 3 strain RP16030-M1, 4 strain CCGMV933, 5 strain CCGMV935, 6 negative control (water).
