# Supplementary material
Source: MDPI journal article supplement (https://www.mdpi.com/2036-7481/13/1/8)
Supplement: s1 [file s1 › Supplementary Table S1.xlsx]

## Sheet: Hoja1
Supplementary Table S1
16S rRNA query coverage and percent identity at NCBI for S. ruminantium strains
Strain	RP15178-A2	RP16030-M1	CCGMV933	CCGMV935	CCGMV928
Query coverage	0.96	0.93	0.98	0.97	0.99
S. ruminantium percent identity	0.9368	0.9753	0.9946	0.9908	0.9909
