# Supplementary material
Source: MDPI journal article supplement (https://www.mdpi.com/2036-7481/13/1/8)
Supplement: s1 [file s1 › Supplementary Table S2.xlsx]

## Sheet: Hoja1
Supplementary Table S2
Biochemical characterization by Vitek 2 GP (Biomérieux) for Gram positive cocci of S. ruminantium isolates from domestic and wild ruminants in Spain and reference S. suis serovar 2 strain P1/7
+, Positive reaction; -, negative reaction; (-), doubtful
Strain		P1/7	RP15178-A2	RP16030-M1	CCGMV933	CCGMV935	CCGMV928
System identification		S. suis I (95%)	S. suis I (95%)	S. suis I (90%)	S. mitis / S. oralis (86%)	S. suis I (93%)	S. dysgalactiae (50%) and S. suis (50%)
Test
AMY	D-Amygdalin	-	-	-	-	-	-
PIPLC	Phosphatidylinositol phospholipase C	-	-	-	-	-	-
dXYL	D-xylose	-	-	-	-	-	-
ADH1	Arginine dihydrolase 1	+	+	-	-	+	+
BGAL	Beta-Galactosidase	-	-	-	-	-	-
AGLU	Alpha-Glucosidase	+	+	+	+	+	+
APPA	Ala-Phe-Pro-Arylamidase	+	+	+	+	+	+
CDEX	Cyclodextrin	-	-	-	-	-	-
AspA	L-Aspartate Arylamidase	(-)	-	+	+	-	-
BGAR	Beta Galactopyranosidase	-	-	-	-	-	-
AMAN	Alpha-Mannosidase	-	-	-	-	-	-
PHOS	Phosphatase	-	-	-	-	-	-
LeuA	Leucine Arylamidase	+	+	+	+	+	+
ProA	L-Proline Arylamidase	-	-	-	-	-	-
BGURr	Beta Glucuronidase	+	+	+	+	+	+
AGAL	Alpha-Galactosidase	+	-	-	-	-	-
PyrA	L-Pyrrolydonyl-Arylamidase	-	-	-	-	-	-
BGUR	Beta-Glucuronidase	-	-	+	-	-	-
AlaA	Alanine Arylamidase	+	+	+	+	+	+
TyrA	Tyrosine Arylamidase	+	+	+	+	+	+
dSOR	D-sorbitol	-	-	-	-	-	-
URE	Urease	-	-	-	-	-	-
POLYB	Polymixin B Resistance	+	+	+	+	-	+
dGAL	D-Galactose	+	+	-	+	-	+
dRIB	D-Ribose	-	-	-	-	-	-
ILATk	L-Lactate alkalinization	-	-	-	-	-	-
LAC	Lactose	+	+	+	+	-	+
NAG	N-Acetyl-D-Glucosamine	-	+	-	-	-	+
dMAL	D-Maltose	+	+	+	+	+	+
BACI	Bacitracin Resistance	-	-	-	-	-	-
NOVO	Novobiocin Resistance	+	+	-	-	-	+
NC6.5	Growth in 6.5% NaCl	-	-	-	+	(-)	-
dMAN	D-Mannitol	-	-	-	-	-	-
dMNE	D-Mannose	+	+	-	-	+	+
MBdG	Methyl-B-D-Glucopyranoside	+	-	-	-	-	-
PUL	Pullulan	-	-	-	+	+	+
dRAF	D-Raffinose	+	-	-	-	+	-
O129R	O/129 Resistance (comp.vibrio.)	-	+	-	-	-	+
SAL	Salicin	-	-	+	-	+	-
SAC	Saccharose/Sucrose	+	+	+	+	+	+
dTRE	D-Trehalose	+	+	+	+	+	+
ADH2s	Arginine Dihydrolase 2	-	+	-	-	-	-
OPTO	Optochin Resistamce	+	+	+	+	+	+
